# Supplementary material for: Network analyses based on comprehensive molecular interaction maps reveal robust control structures in yeast stress response pathways
Source: PubMed Central journal article supplement (PMC5516916; doi:10.1038/npjsba.2015.18), 2016-01-07

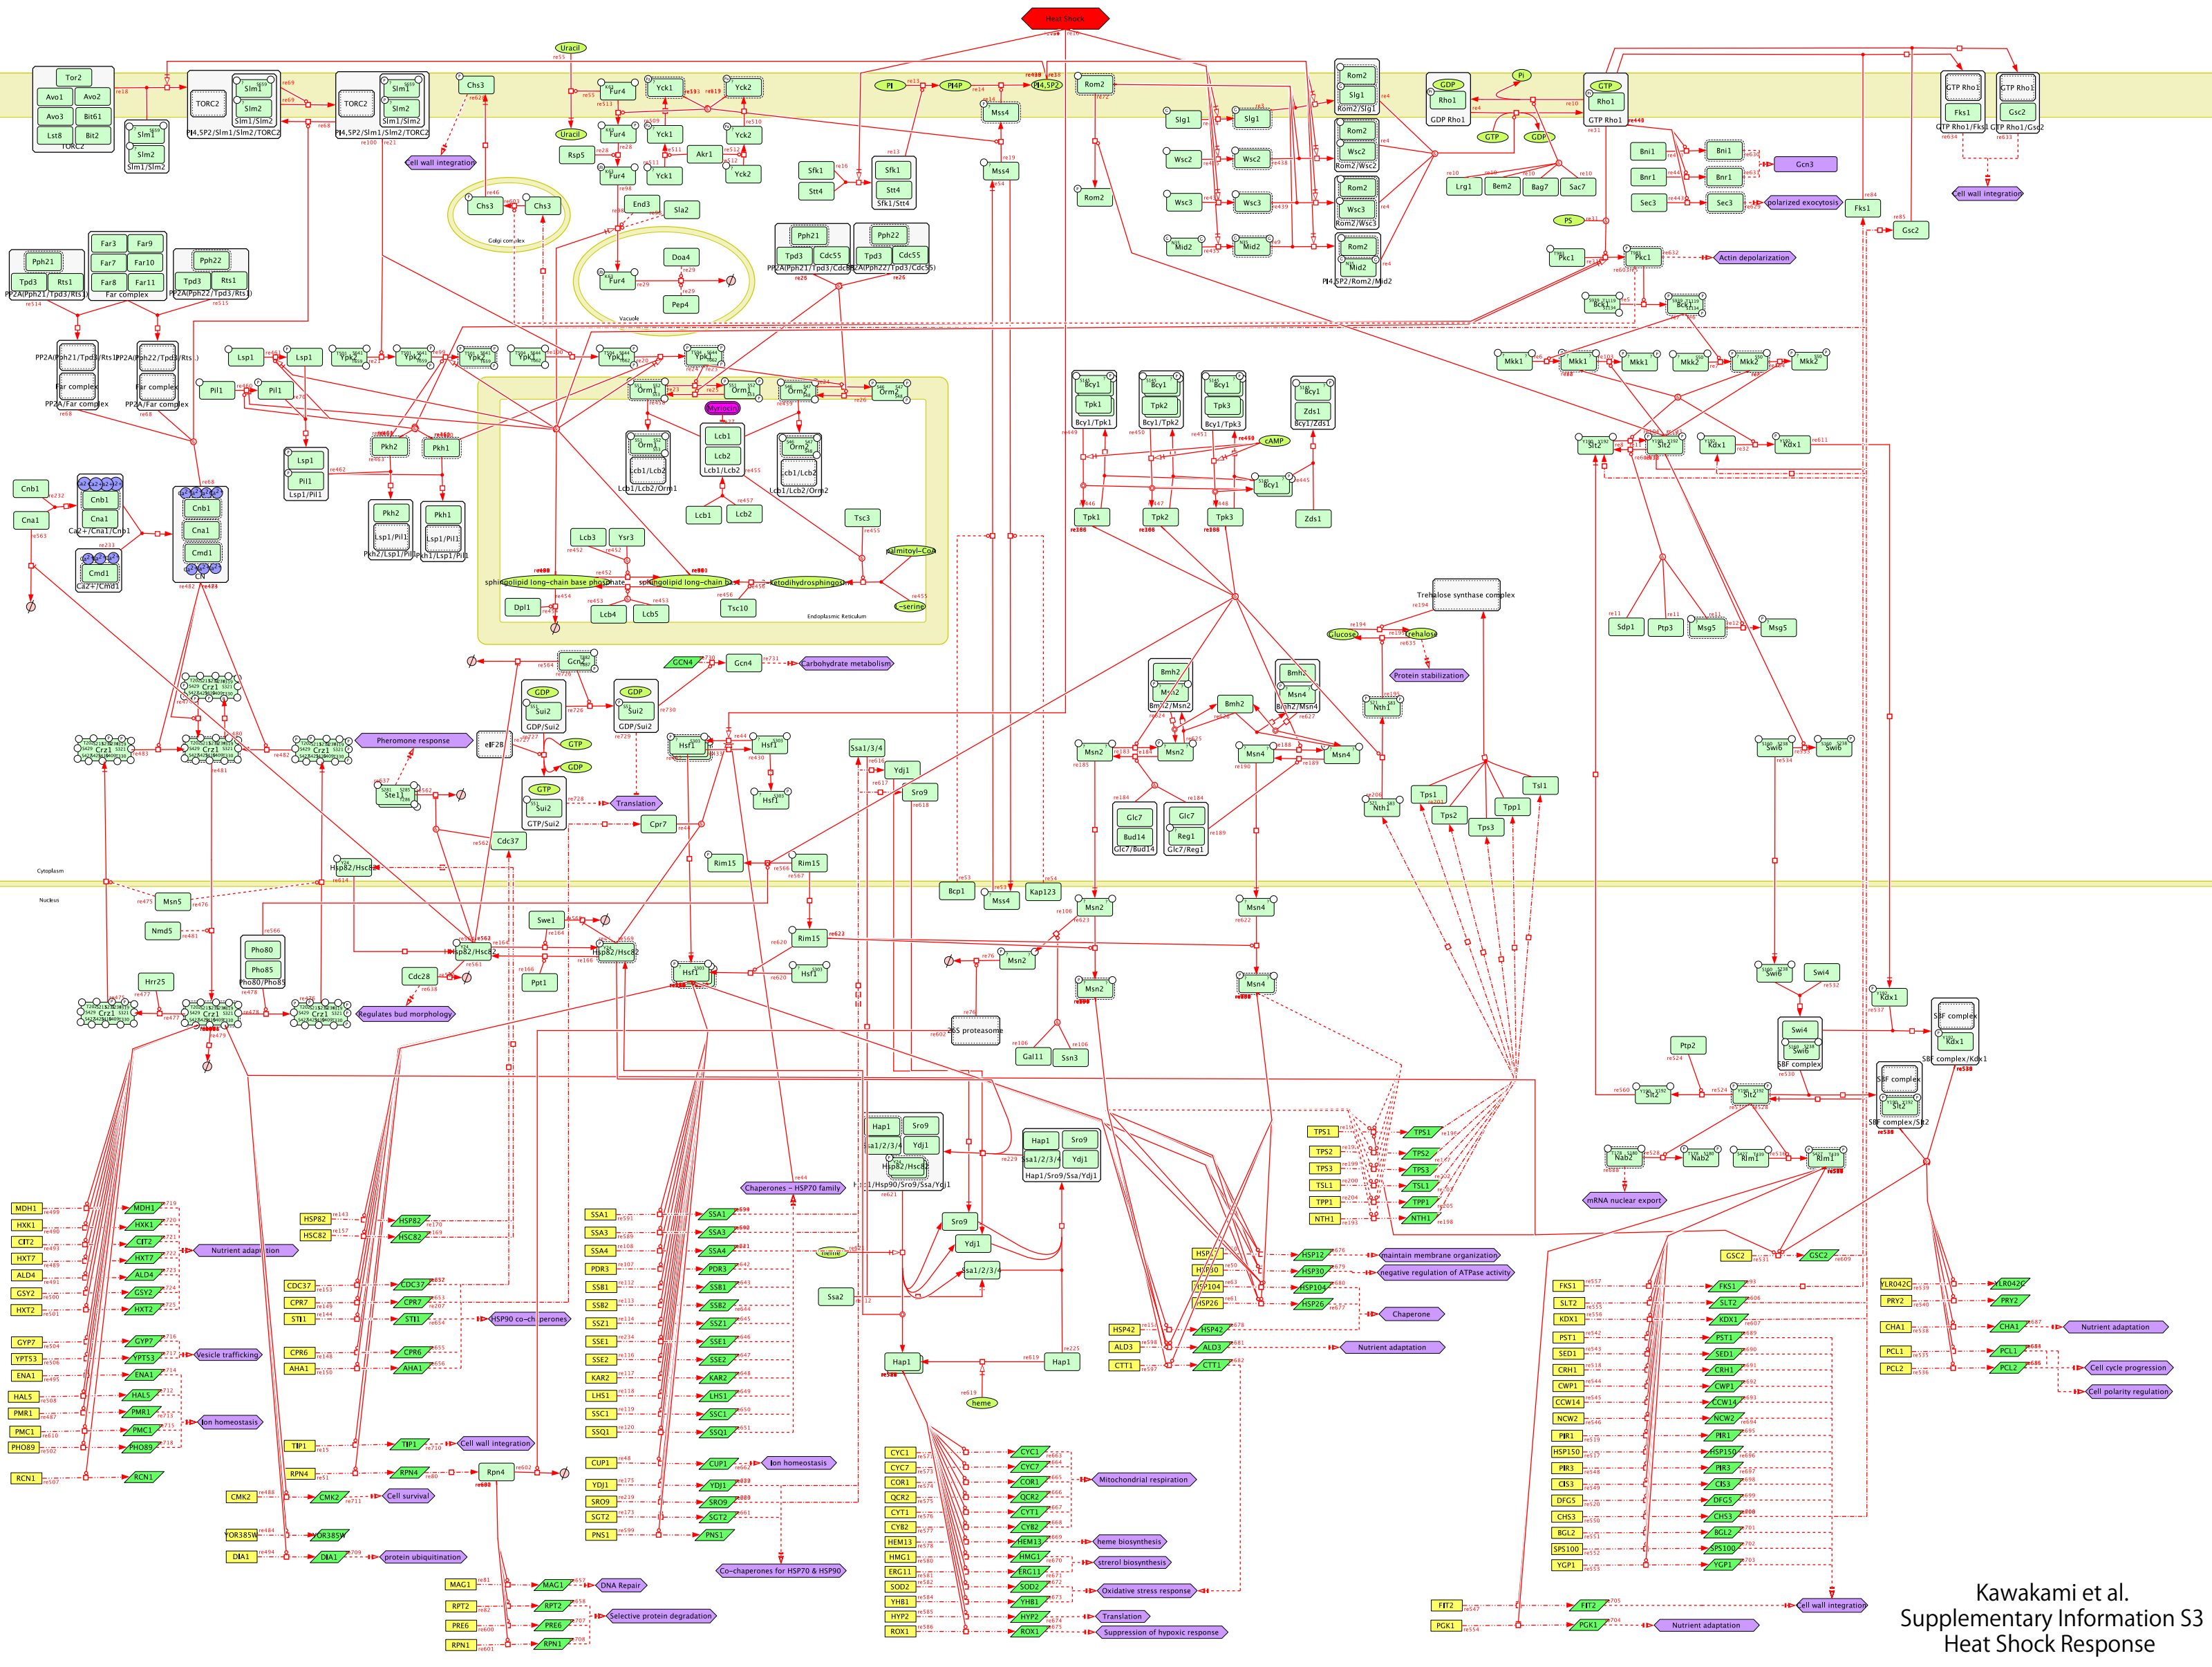

Kawakami et al.  
 Supplementary Information S3  
 Heat Shock Response



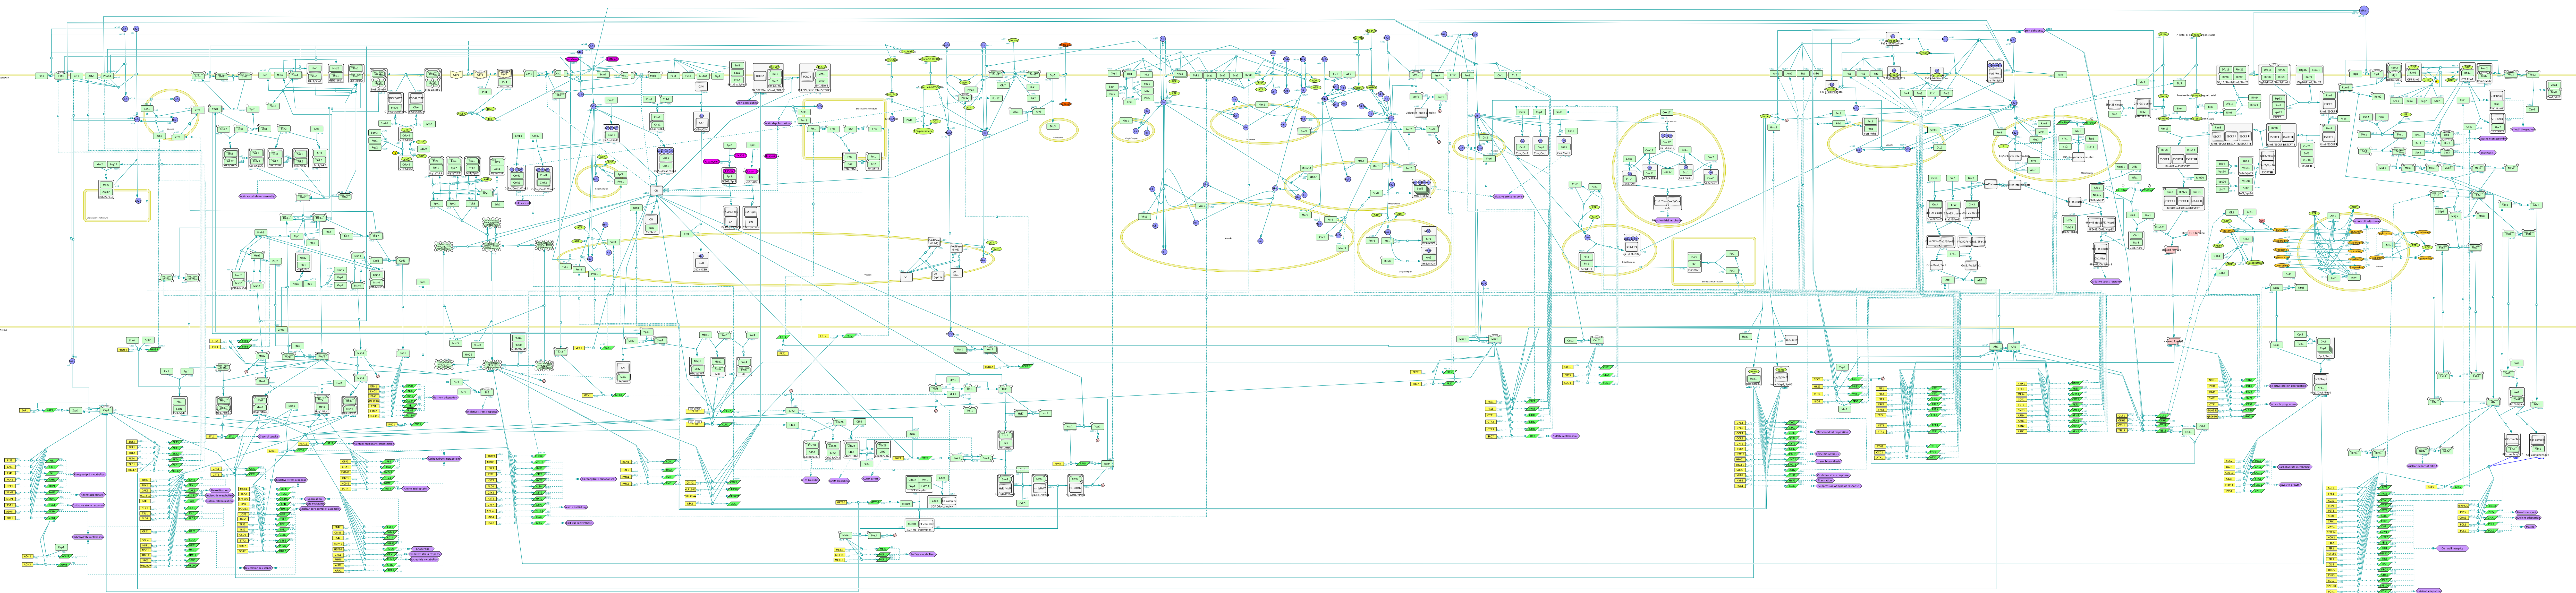



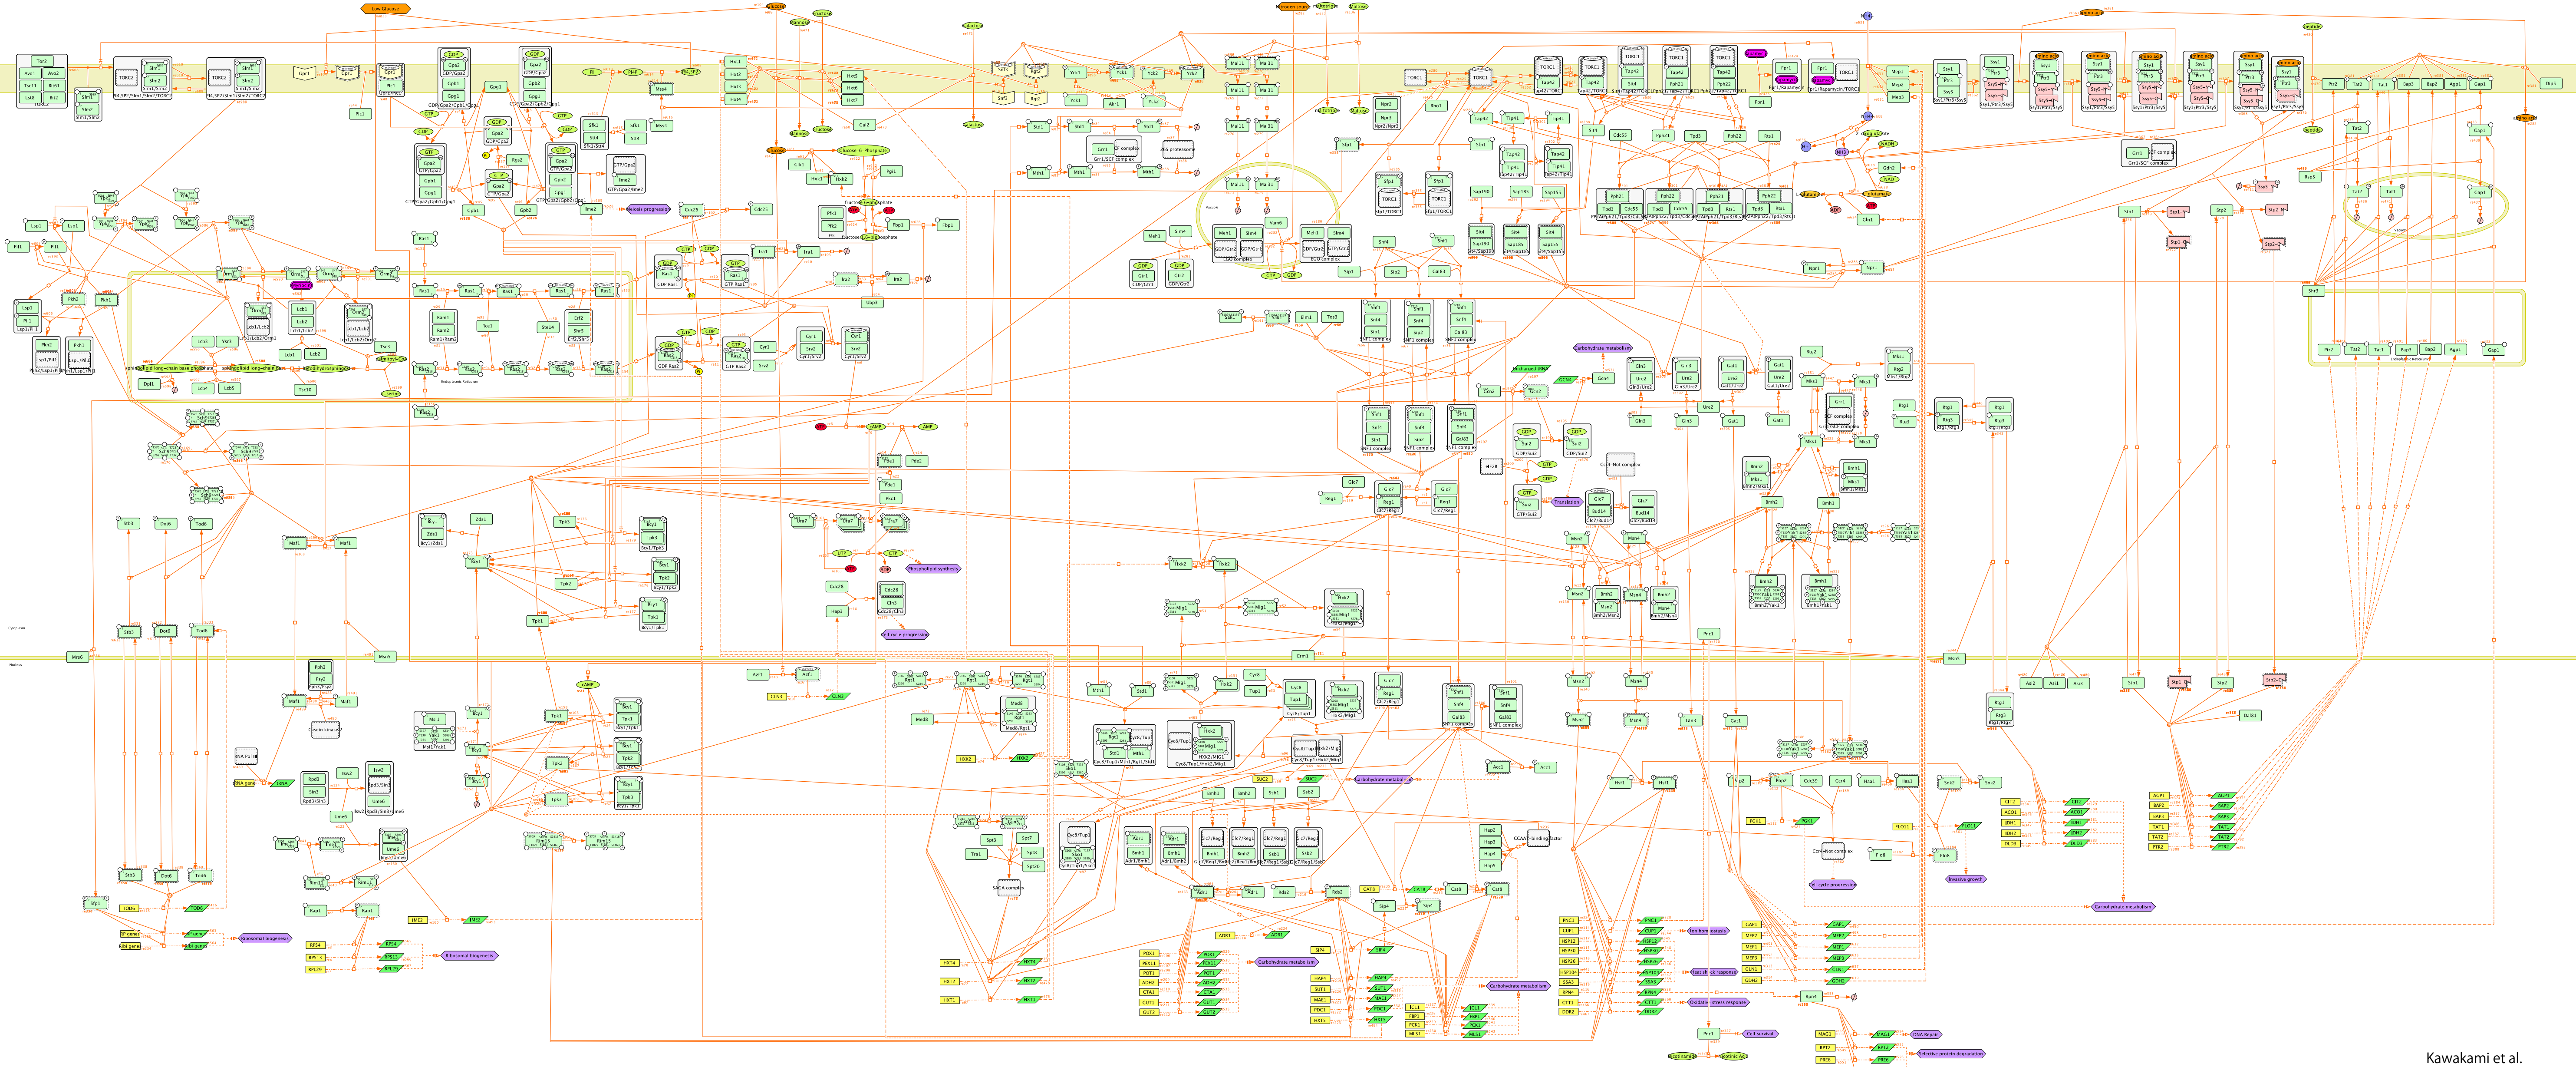



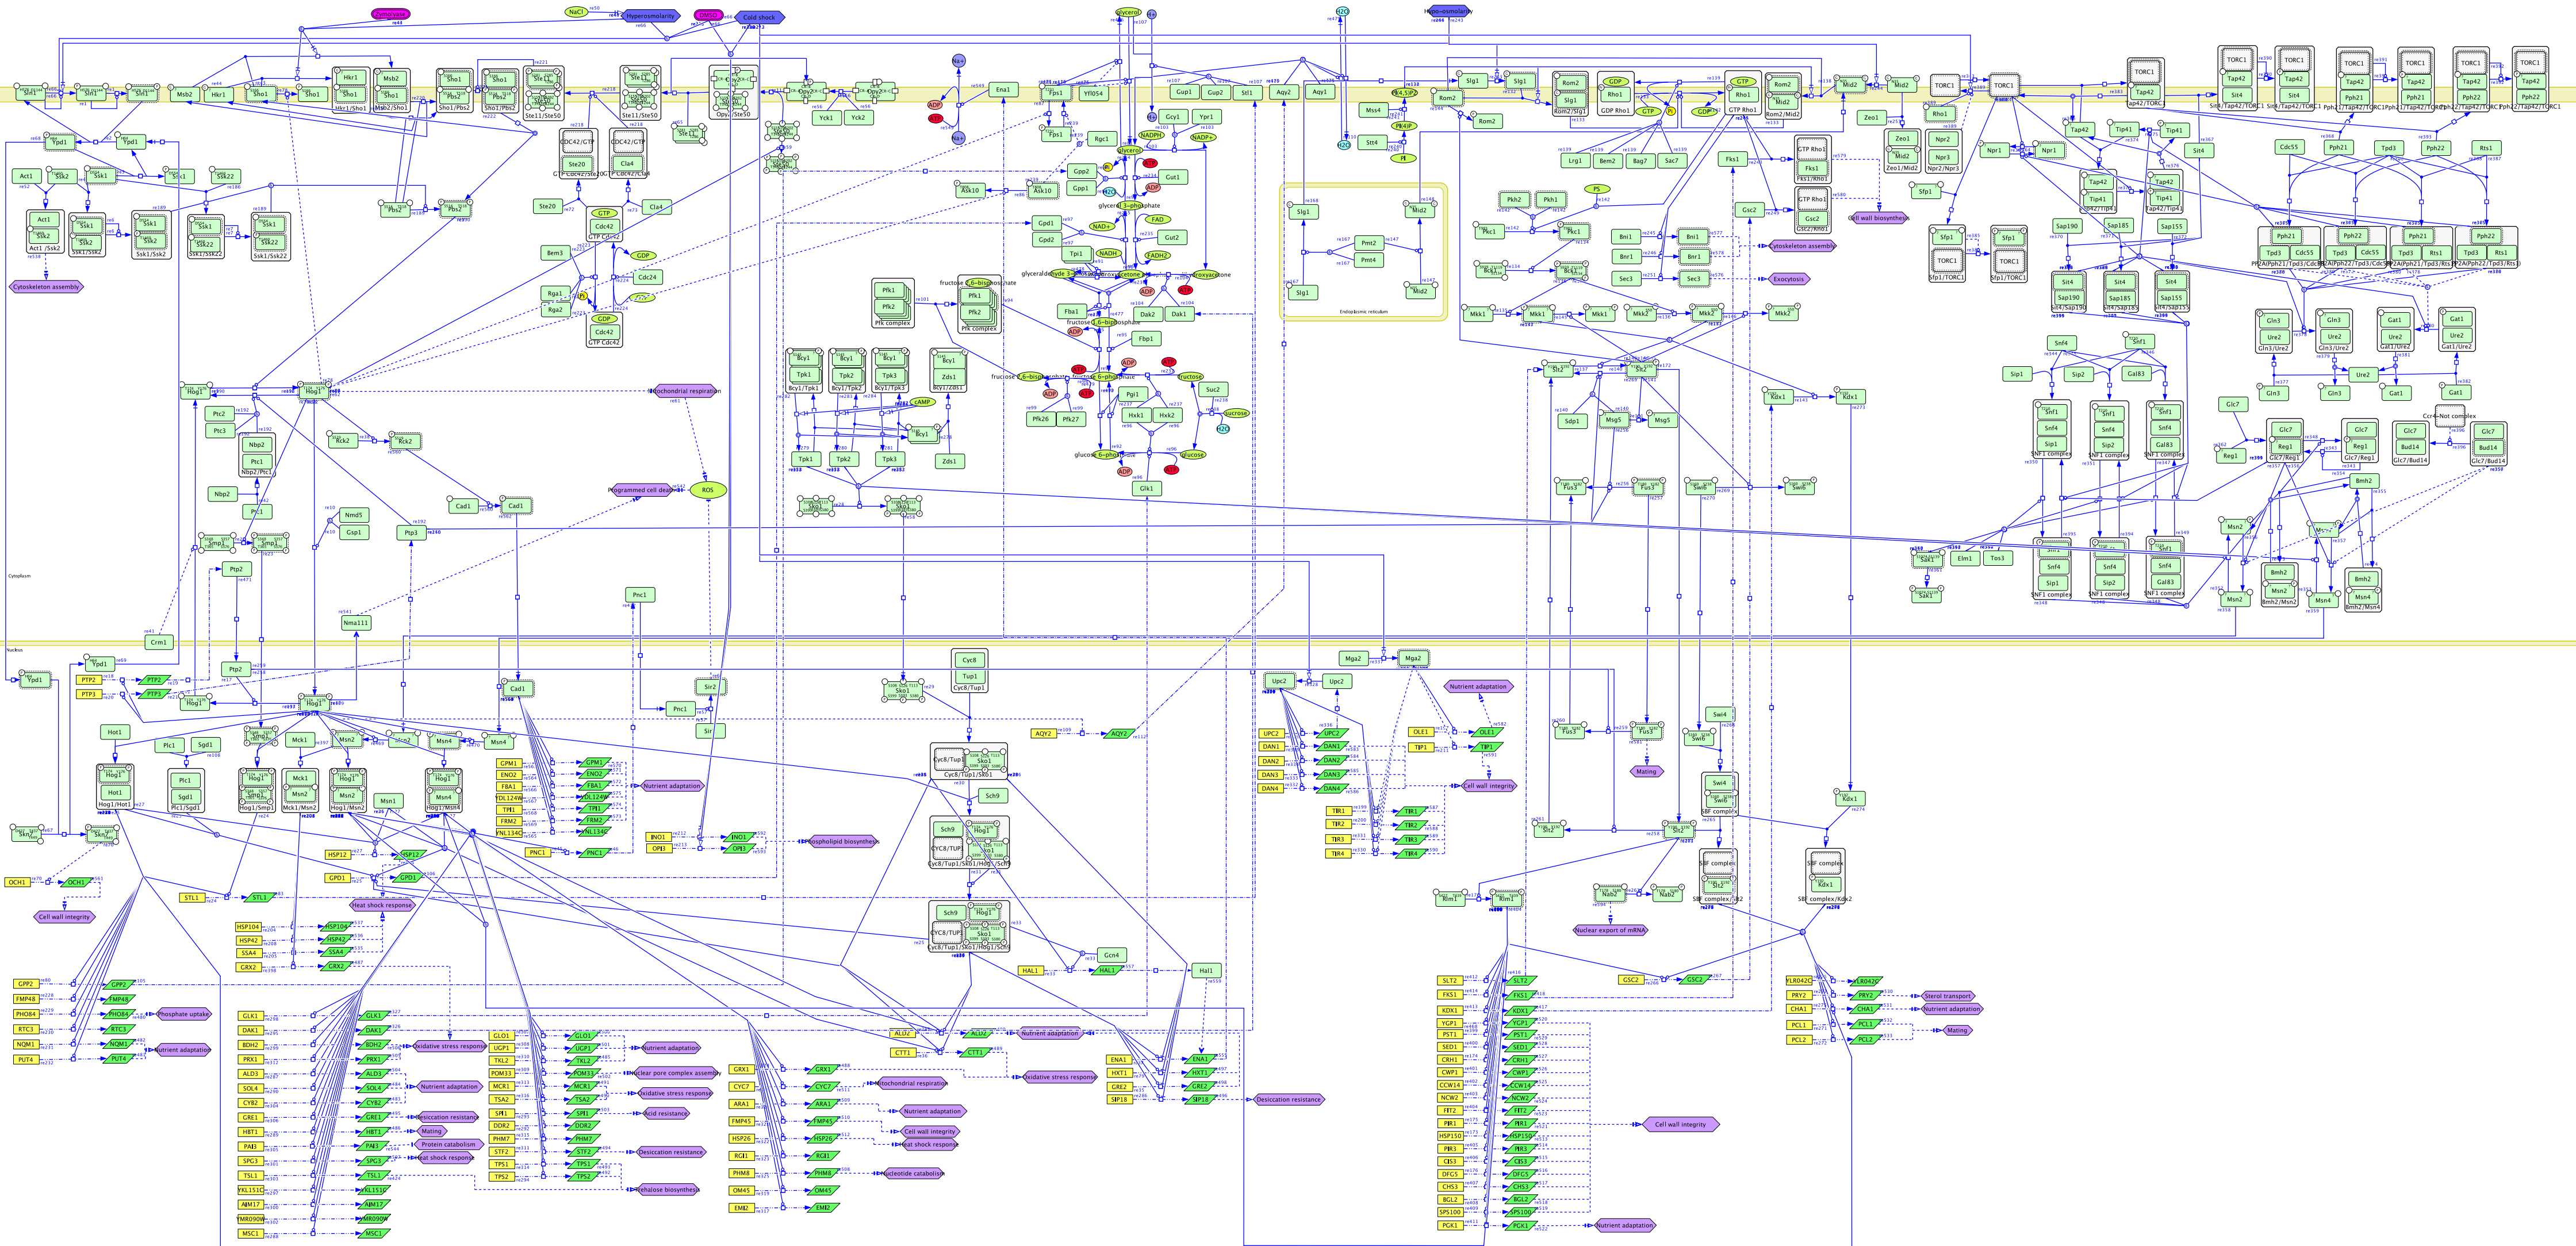



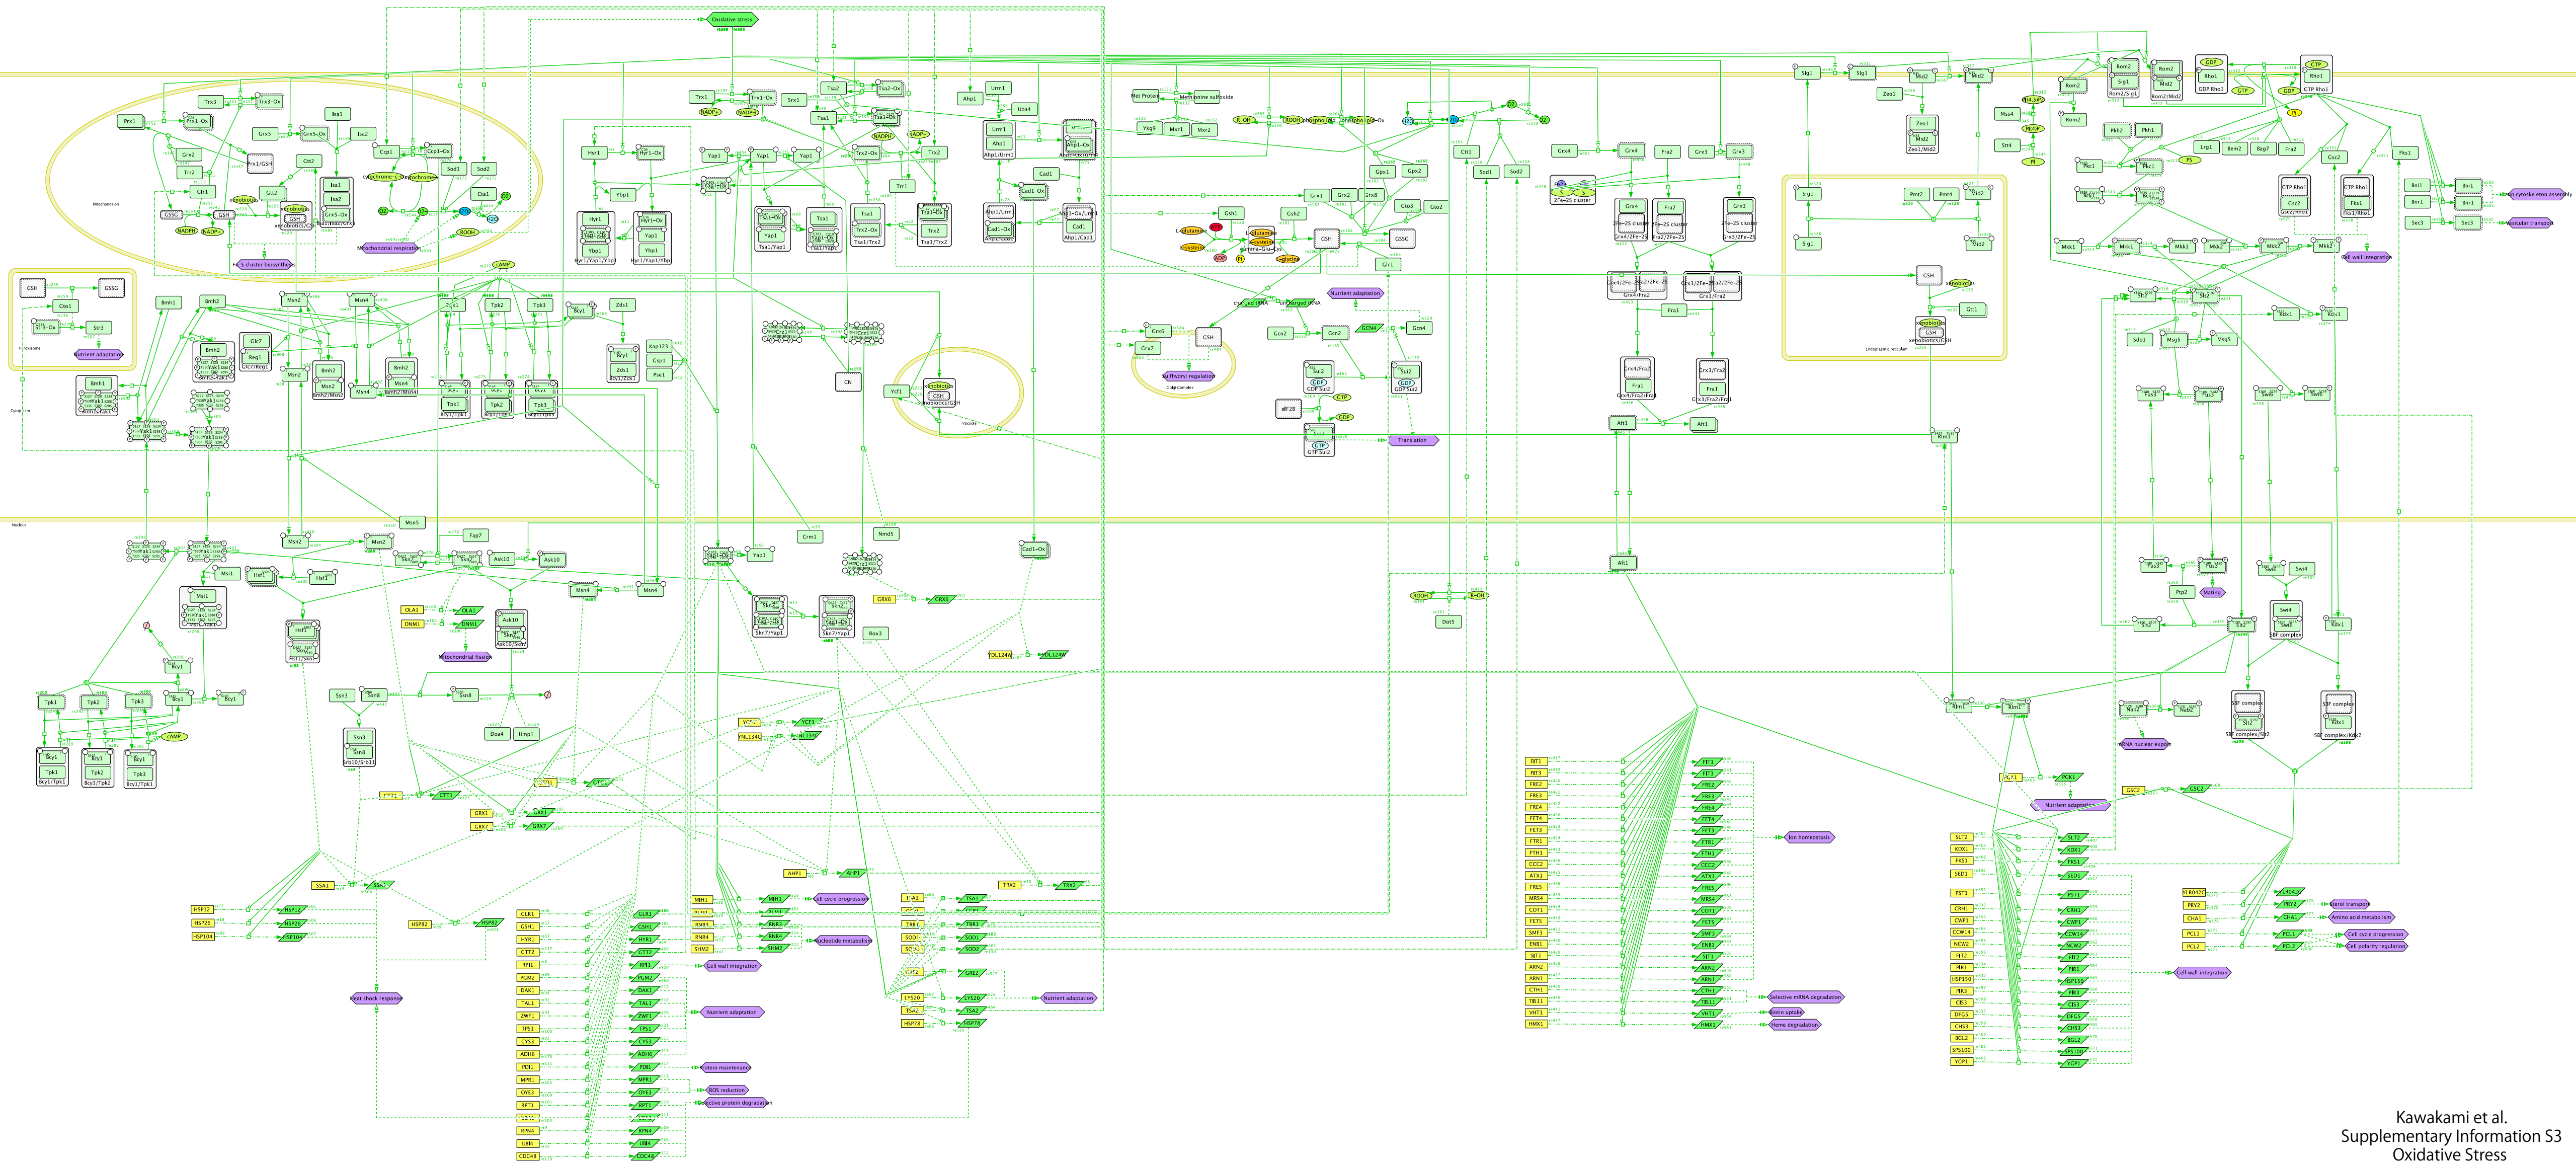



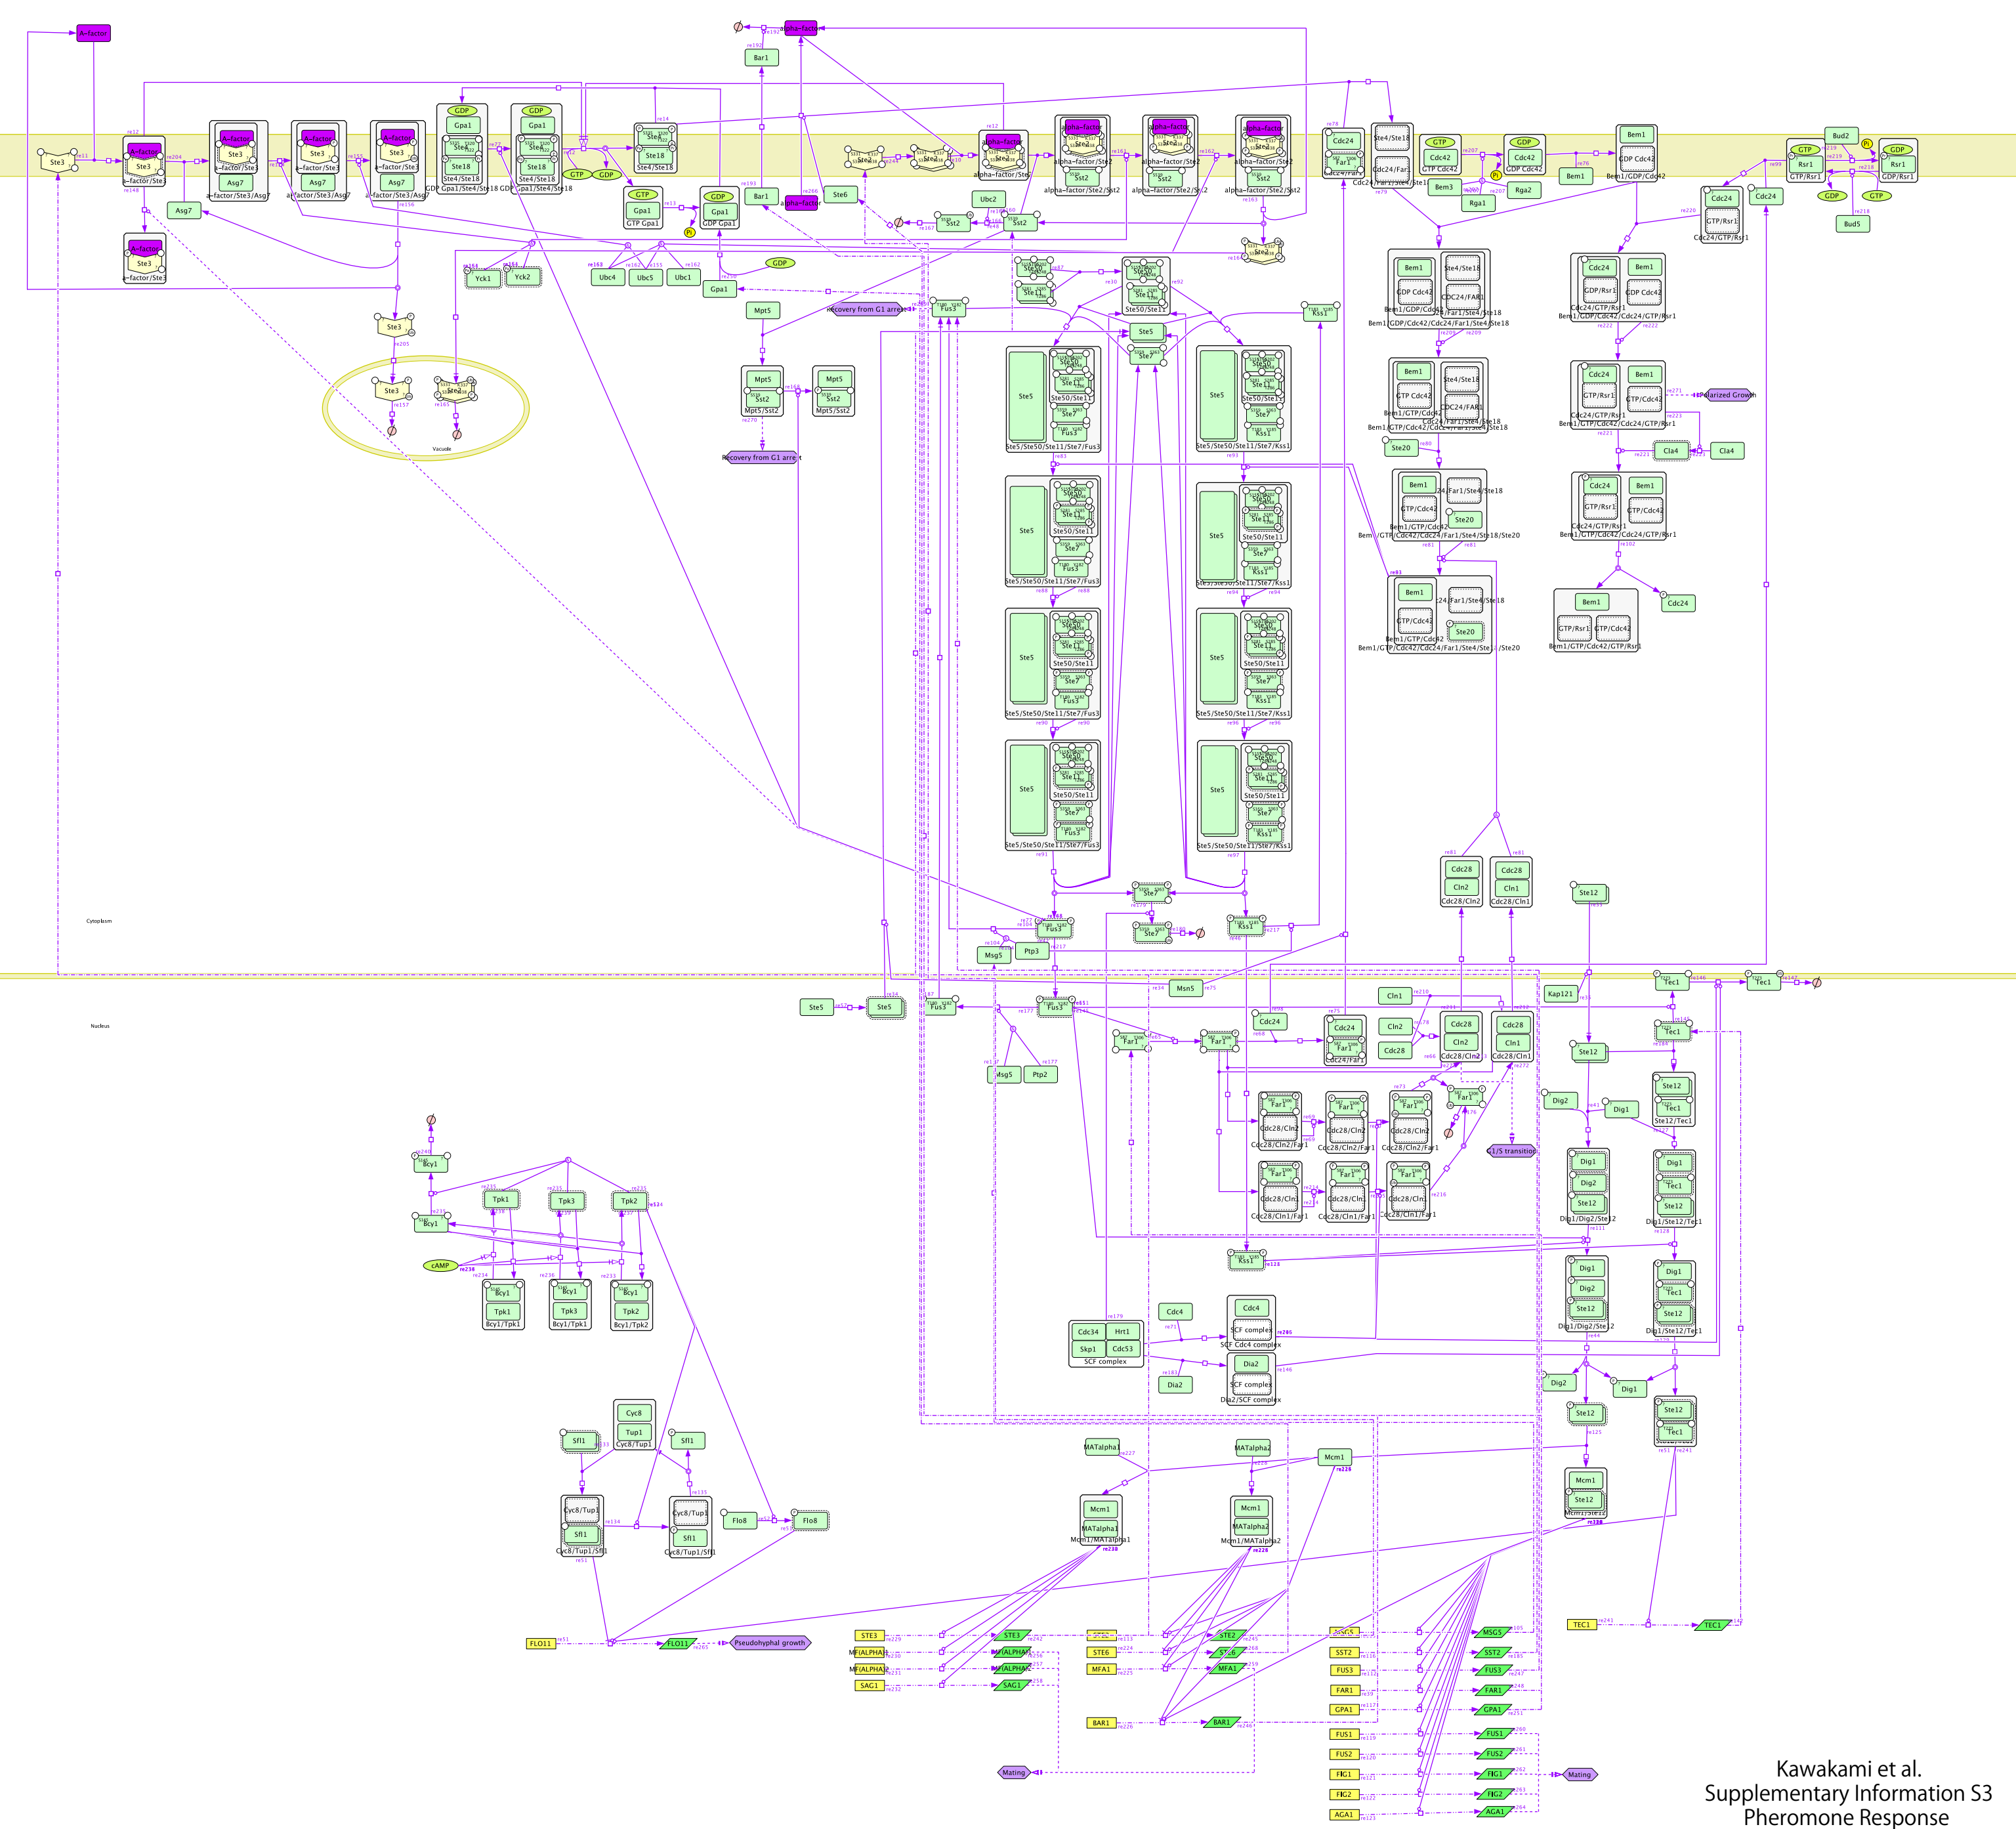

Supplement: npjsba201518-s3.pdf [file npjsba201518-s3.pdf]
